# Supplementary material for: PACVr: plastome assembly coverage visualization in R
Source: PubMed Central journal article supplement (PMC7245912; doi:10.1186/s12859-020-3475-0), 2020-05-24

# ADDITIONAL FILE 1

## PACVr: Plastome Assembly Coverage Visualization in R

Michael Gruenstaeudl<sup>1\*</sup> Nils Jenke<sup>2</sup>

<sup>1</sup> Institut für Biologie, Freie Universität Berlin, 14195 Berlin, Germany <sup>2</sup> Institut für Bioinformatik, Freie Universität Berlin, 14195 Berlin, Germany

\* [m.gruenstaeudl@fu-berlin.de](mailto:m.gruenstaeudl@fu-berlin.de)

**Fig. S3** Visualization of coverage depth and IR equality of the plastid genome of *Pelargonium x hortorum* (GenBank accession NC\_008454), which has a genome size that is substantially larger than the typical size range of angiosperm plastomes.

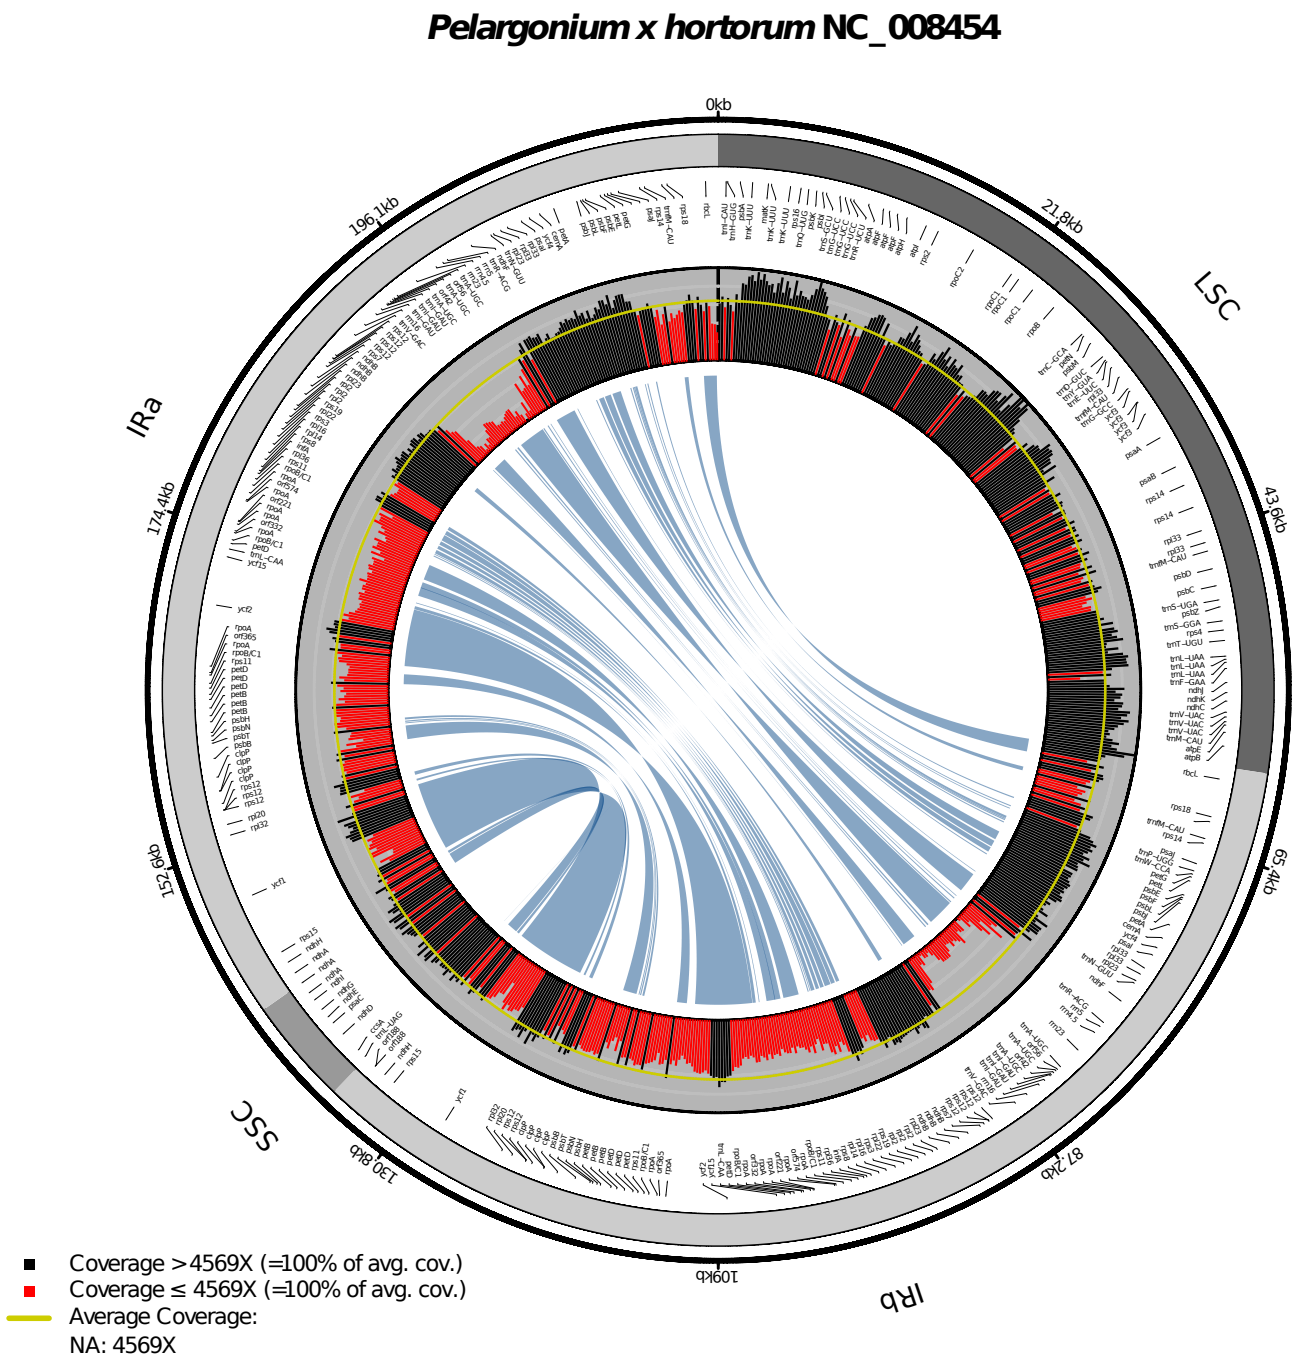

Supplement: 12859_2020_3475_MOESM2_ESM.pdf [file 12859_2020_3475_MOESM2_ESM.pdf]
